# Supplementary material
Source: publisher figshare collection journal article supplement (https://tandf.figshare.com/articles/dataset/_/1284401)

Supplemental Figure 2

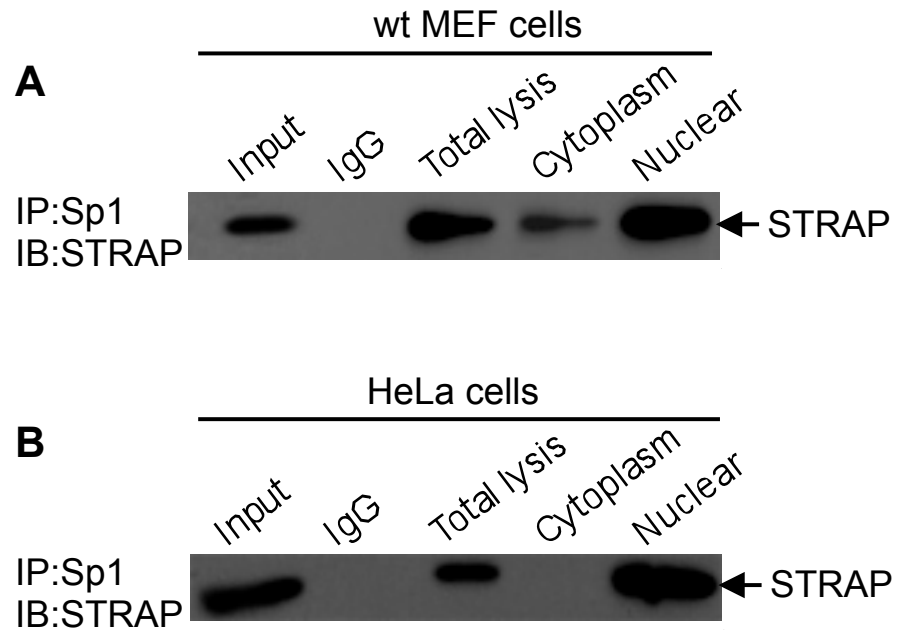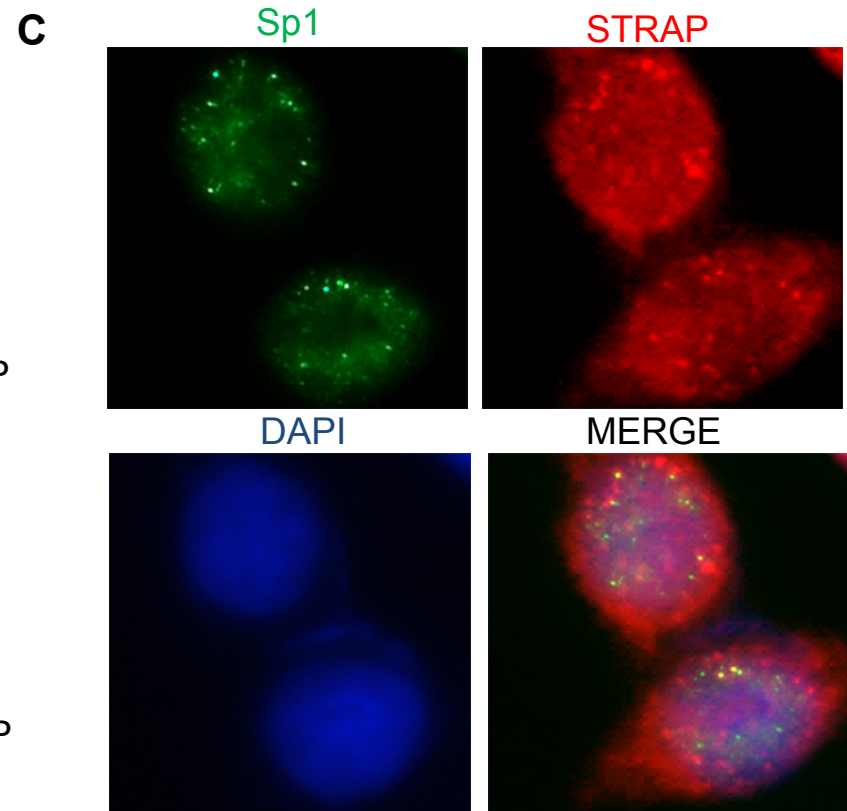

Supplement: Supplementary file 1 [file 4]

# Supplemental Figure 1

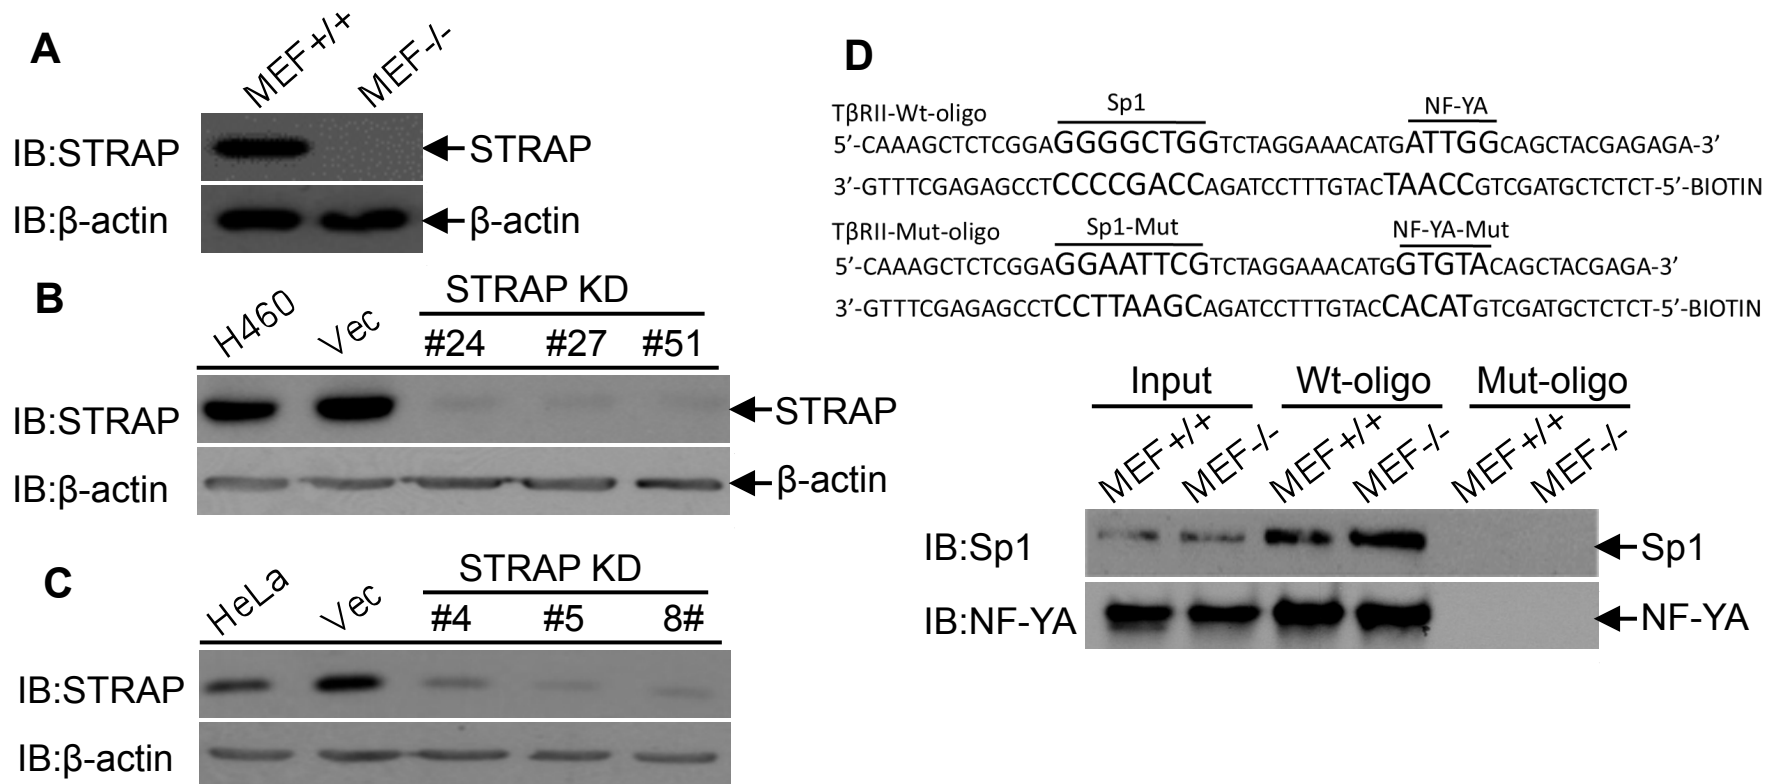

Supplement: Supplementary file 2 [file 4]
